# Supplementary material
Source: PubMed Central journal article supplement (PMC4614877)
Supplement: cri_36_4_231_esm3.pdf [file cri_36_4_231_esm3.pdf]

**Table S1: Subgroup Analysis for Life-time History of Suicide Attempt and Lifetime History of Self-Injury using Full Candidate Model**

| <u>Characteristics</u>             | Full Model Suicide Attempt<br>( N=2401 ) | Full Model Self-Injury Without Intent to Die<br>(N=1829) |
|------------------------------------|------------------------------------------|----------------------------------------------------------|
|                                    | aOR, [95% CI]                            | aOR, [95% CI]                                            |
| <b>Sex (male)</b>                  | 0.81*<br>[0.67,0.98]                     | 0.57**<br>[0.42,0.78]                                    |
| <b>Marital Status</b>              | 0.86<br>[0.69,1.07]                      | 1.16<br>[0.82,1.66]                                      |
| <b>Employed</b>                    | 1.11<br>[0.83,1.49]                      | 0.9<br>[0.57,1.43]                                       |
| <b>Other Sources of Income</b>     | 1.18<br>[0.92,1.50]                      | 0.82<br>[0.56,1.21]                                      |
| <b>Age 15-24 years (Reference)</b> | 1<br>[1.00,1.00]                         | 1<br>[1.00,1.00]                                         |
| <b>25-29</b>                       | 1.15<br>[0.75,1.78]                      | 0.63<br>[0.35,1.13]                                      |
| <b>30-39</b>                       | 1.35<br>[0.91,1.98]                      | 0.59*<br>[0.35,0.99]                                     |
| <b>40-49</b>                       | 1.46+<br>[0.99,2.13]                     | 0.48**<br>[0.28,0.81]                                    |
| <b>50-59</b>                       | 1.23<br>[0.84,1.80]                      | 0.43**<br>[0.25,0.73]                                    |
| <b>60-69</b>                       | 1.05<br>[0.68,1.60]                      | 0.33**<br>[0.17,0.64]                                    |
| <b>70-79</b>                       | 0.42**<br>[0.24,0.74]                    | 0.24**<br>[0.10,0.57]                                    |

|                                                                |                       |                       |
|----------------------------------------------------------------|-----------------------|-----------------------|
| <b>80+</b>                                                     | 0.31**<br>[0.18,0.55] | 0.10**<br>[0.03,0.30] |
| <b>Psychiatric Disorders Due to General Medical Conditions</b> | 0.43*<br>[0.19,0.95]  | 0.62<br>[0.15,2.62]   |
| <b>Substance Use Disorders</b>                                 | 1.30*<br>[1.01,1.67]  | 1.59*<br>[1.10,2.31]  |
| <b>Schizophrenia</b>                                           | 0.31**<br>[0.22,0.42] | 0.99<br>[0.60,1.61]   |
| <b>Mood Disorders</b>                                          | 1.39*<br>[1.05,1.83]  | 1.51+<br>[0.99,2.32]  |
| <b>Anxiety Disorders</b>                                       | 0.64*<br>[0.45,0.90]  | 1.09<br>[0.65,1.81]   |
| <b>Personality Disorders</b>                                   | 2.11**<br>[1.57,2.83] | 1.06<br>[0.67,1.66]   |
| <b>Other Disorders</b>                                         | 0.99<br>[0.73,1.32]   | 1.25<br>[0.80,1.96]   |

\*Indicates  $p \leq 0.05$ , \*\* indicates  $p \leq 0.01$ , \*\*\*indicates  $p \leq 0.001$

+ indicates trend  $p \leq 0.10$

CI=Confidence Interval

Male is coded as 1, Female as 0

Marital Status (1 with partner, 0 without) is dichotomized as either with (married or identified significant partner) or without (never married, widowed, separated, divorced) a significant partner

Other Incomes include: social assistance, disability insurance, employment insurance, other or no income

Other disorders include disorders of childhood/adolescence, cognitive disorders, somatoform disorders, factitious disorders, dissociative disorders, sexual and gender identity disorders, eating disorders, sleep disorders, impulse-control disorders not classified elsewhere, and adjustment disorders
