# Supplementary material
Source: PubMed Central journal article supplement (PMC4614877)

**Figure SF1: Patient recruitment diagram**

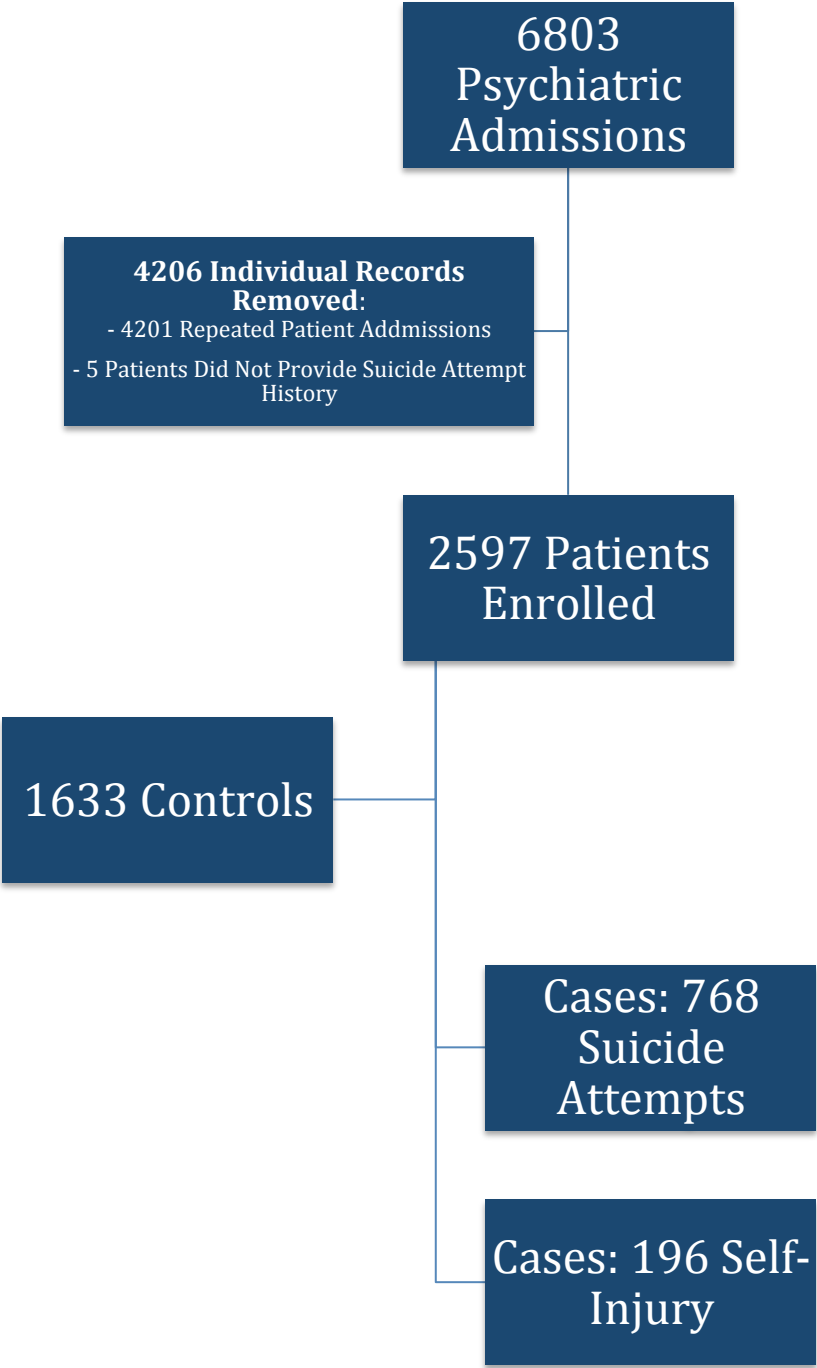

Supplement: cri_36_4_231_esm1.pdf [file cri_36_4_231_esm1.pdf]

Figure SF2: Decision curve analysis (validation sample, n=674)

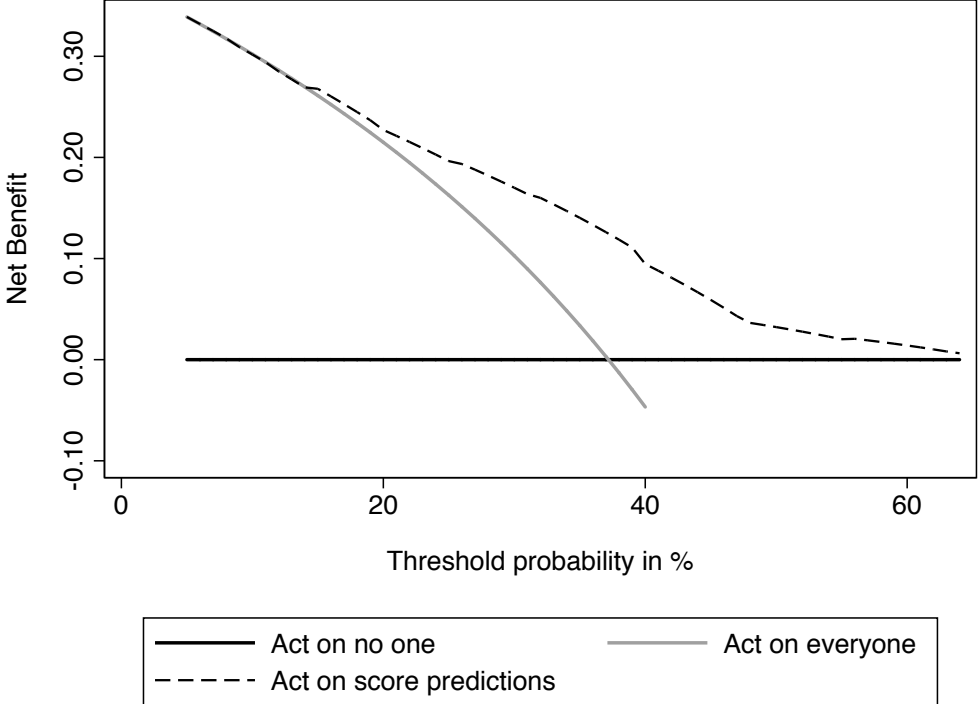

Supplement: cri_36_4_231_esm2.pdf [file cri_36_4_231_esm2.pdf]
